# 1 Transkingdom Analysis of the Female Reproductive Tract

## 2 Reveals Bacteriophages Form Communities

3 Ferralita S. Madere<sup>1</sup>, Michael Sohn<sup>2</sup>, Angelina Winbush<sup>3</sup>, Breóna Barr<sup>4</sup>, Alex Grier<sup>5</sup>, James

4 Java<sup>5</sup>, Tracy Meiring<sup>6</sup>, Anna-Lise Williamson<sup>6,7</sup>, Linda-Gail Bekker<sup>8</sup>, David H. Adler<sup>9</sup>, Cynthia

5 L. Monaco<sup>1,10\*</sup>

6

7 *<sup>1</sup>Department of Microbiology and Immunology, University of Rochester Medical Center,*

8 *Rochester, NY, USA*

9 *<sup>2</sup>Department of Biostatistics and Computational Biology, University of Rochester Medical*

10 *Center, Rochester, NY, USA*

11 *<sup>3</sup>University of Rochester School of Medicine & Dentistry, Rochester, NY, USA*

12 *<sup>4</sup> Department of Rural Family Medicine, West Virginia University, Morgantown, WV*

13 *<sup>5</sup>UR Genomics Research Center, University of Rochester Medical Center, Rochester, NY, USA*

14 *<sup>6</sup>Institute of Infectious Diseases & Molecular Medicine and Division of Medical Virology,*

15 *Faculty of Health Sciences, University of Cape Town, Anzio Road, Observatory, Cape Town,*

16 *South Africa*

17 *<sup>7</sup>National health Laboratory Service, Groote Schuur Hospital, Cape Town, South African*

18 *<sup>8</sup>Desmond Tutu HIV Centre, Institute of Infectious Diseases & Molecular Medicine, Faculty of*

19 *Health Sciences, University of Cape Town, Anzio Road, Observatory, Cape Town, South Africa*

20 *<sup>9</sup>Department of Emergency Medicine, University of Rochester Medical Center, Rochester, NY,*

21 *USA*

22 <sup>10</sup>*Department of Internal Medicine, Division of Infectious Diseases, University of Rochester*

23 *Medical Center, Rochester, NY, USA*

24 *\*Correspondence: Cynthia\_Monaco@URMC.Rochester.edu*

25

## 26 **Abstract**

27 The female reproductive tract (FRT) microbiome plays an important role in maintaining vaginal  
28 health. Viruses play a key role in regulating other microbial ecosystems, but little is known about  
29 how the FRT viruses (virome), particularly bacteriophages, impacts FRT health and dysbiosis. We  
30 hypothesize that bacterial vaginosis is associated with alterations in the FRT virome, and these  
31 changes correlate with bacteriome shifts. We conducted a retrospective, longitudinal analysis of  
32 vaginal swabs collected from 54 bacterial vaginosis (BV)-positive and 46 BV-negative South  
33 African women. Bacteriome analysis revealed samples clustered into five distinct bacterial  
34 community groups (CG). Bacterial alpha diversity was significantly associated with BV. Virome  
35 analysis on a subset of baseline samples showed FRT bacteriophages clustering into novel viral  
36 state types (VSTs), a viral community clustering system based on virome composition and  
37 abundance. Distinct BV bacteriophage signatures included increased alpha diversity along with  
38 *Bacillus*, *Burkholderia* and *Escherichia* bacteriophages. Discriminate bacteriophage-bacteria  
39 transkingdom associations were also identified between *Bacillus* and *Burkholderia* viruses and  
40 BV-associated bacteria, providing key insight for future studies elucidating transkingdom  
41 interactions driving BV-associated microbiome perturbations. In this cohort, bacteriophage-  
42 bacterial associations suggest complex interactions which may play a role in the establishment and  
43 maintenance of BV.

44

- 45 **Keywords:** virome, microbiome, bacterial vaginosis, bacteriophage, transkingdom associations,  
46 female genital tract

## 47 **Introduction**

48

49 The female reproductive tract (FRT) houses a compositionally dynamic environment where the  
50 host participates in an intricate interplay with a microbiome composed of bacteria and archaea  
51 (bacteriome), fungi (fungome), viruses (virome), and occasional prokaryotic parasites [1, 2]. The  
52 FRT microbiome plays an important protective role in maintaining vaginal health and preventing  
53 urogenital diseases such as bacterial vaginosis (BV), yeast infections, pre-term birth and sexually  
54 transmitted infections including HIV [3-5]. Prior studies of the FRT microbiome have primarily  
55 focused on determining bacterial composition and function. At least five different bacterial  
56 community groupings have been described within the FRT, distinguishable by the dominance of  
57 *Lactobacillus* species or presence of more diverse anaerobes [6, 7]. Prevalence of these  
58 communities varies by ethnic group, with majority of Caucasian women hosting *Lactobacillus*-  
59 dominant FRT microbiomes, whereas African women tend to be asymptotically colonized by  
60 higher diversity FRT microbiota [7, 8]. *Lactobacillus*-dominant FRT bacteriomes, especially *L.*  
61 *crispatus*, protect against vaginal diseases by competitive exclusion against pathogenic bacteria  
62 for space and nutrients or by promoting an acidic vaginal environment via production of lactic acid  
63 and maintaining a low inflammatory state [9-11]. BV, the most common cause of vaginal discharge  
64 in reproductive-age women, is a symptomatic clinical condition characterized by a shift in the FRT  
65 microbiota away from a low inflammatory, *Lactobacillus*-dominant microbiome to more diverse  
66 community including facultative anaerobes. BV is associated with an increased risk of sexually  
67 transmitted infection (STI) acquisition and pre-term birth [12, 13]. FRT bacteriome shifts can  
68 occur rapidly and may be related to shifts in bacteriophage populations [14, 15]. Specific BV-

69 associated bacteria include *Gardnerella vaginalis*, *Prevotella*, *Fusobacterium*, *Atopobium*  
70 *vaginae*, *Megasphaera*, and *Sneathia* among others [16].

71

72 Viruses rival bacterial numbers in the microbiome and are more diverse [1]. However, studies of  
73 the virome have been limited in part due to lack of a common viral genetic element analogous to  
74 the bacterial 16S rRNA gene, as well as the high genetic diversity between viral species [1, 17].

75 The FRT virome is home to eukaryotic viruses and bacteriophages [1]. Compared to the FRT  
76 bacteriome, little is known about the viral communities of the FRT and how their interactions with  
77 bacteria contribute to disease states such as bacterial vaginosis (BV). The few prior studies that

78 have examined the FRT virome have mainly concentrated on the DNA eukaryotic virome, finding  
79 *Papillomaviridae*, *Polyomaviridae*, *Herpesviridae*, *Poxviridae*, *Adenoviridae*, and *Anelloviridae*  
80 present [18, 19]. However, bacteriophages are the largest and most abundant viral group and can

81 modulate bacterial composition and abundance, suggesting that they may play an important role  
82 in regulating bacterial composition of the FRT microbiome [17, 20]. Bacteriophages may be lytic,  
83 hijacking bacterial host replication machinery in order to replicate and then lysing the bacterial

84 host to release virions, or lysogenic, whereby bacteriophage DNA is integrated into the bacterial  
85 host genome as a prophage and replicates with bacterial genome replication [21]. This lysogenic  
86 lifestyle can result in generalized transduction of bacterial genes between bacterial hosts that can

87 confer increased fitness through methods such as toxin production, carbohydrate metabolism, or  
88 antibiotic resistance [22]. Upon environmental stress, lysogenic bacteria can become lytic, and  
89 therefore may serve to regulate bacterial populations in unfavorable host conditions.

90

91 Data on bacteriophage populations in the FRT are limited. One study revealed numerous  
92 *Caudovirales* order bacteriophage in the FRT; however, no relationship was found between FRT  
93 *Caudovirales* bacteriophages and bacterial populations [4]. Additionally, other investigations  
94 studying BV-positive and BV-negative samples in a cohort of Danish women found no significant  
95 difference in viral nor bacterial alpha diversity between BV-positive and BV-negative women [23].  
96 While brief characterization of the vaginal microbiome in pregnant women found an absence of  
97 *Microviridae* and *Herelleviridae* bacteriophage families in a pregnant woman without vaginitis  
98 [24]. Neither of these studies, however, employed significant sequencing depths necessary to  
99 perform a through characterization of the FRT phageome and identify distinct perturbations  
100 between health and disease. *Lactobacillus* bacteriophages have been isolated from human FRT  
101 *Lactobacillus* species and have been observed to have broad host ranges, capable of infecting  
102 multiple *Lactobacillus* species [24]. Upon induction, lysogenic phages within lactobacilli can lyse  
103 their host and enable pathogenic bacteria to flourish, suggesting their possible role in regulating  
104 bacteriome composition and promoting the growth of BV-associated bacteria [25-28]. Further in  
105 support of this hypothesis, high gene expression of the CRISPR anti-bacteriophage defense system  
106 occurs in BV, suggesting that an altered phage load could contribute to the hallmark dysbiosis  
107 observed in BV [29-32].

108  
109 Herein we investigated FRT virome composition and transkingdom bacterial-bacteriophage  
110 associations within the FRT. We assessed the vaginal samples of 100 young, sexually active BV-  
111 positive and -negative South African women to identify discriminate viral and bacterial signatures  
112 in health and FRT disease. We show for the first time that FRT DNA bacteriophage populations  
113 cluster into community groupings that correspond to bacterial community groupings, and that

114 specific bacteriophages correlate with bacteria associated with and protective against BV. These  
115 findings improve our understanding of the transkingdom associations in the FRT microbiome and  
116 the impact that these could have on the induction and pathogenesis of disease.

117

## 118 **Methods**

### 119 **Study Cohort**

120 De-identified vaginal swabs from the University of Cape Town HPV-HIV study [33] were  
121 retrospectively used for bacteriome and virome analysis. This cohort was comprised of 50 HIV-  
122 positive and 50 HIV-negative young, sexually active women between the ages of 16 and 21  
123 recruited from the youth community center and clinic in two urban disadvantaged communities  
124 (Masiphumelele and Mthatha townships) in Cape Town, South Africa between October 2012 and  
125 October 2014. Informed consent was obtained from all participants above 18 years of age and  
126 parental consent was obtained for participants of age 17 or younger. This study was approved by  
127 the Institutional Review Board at University of Rochester Medical Center and the Human Research  
128 Ethics committee at the University of Cape Town. Vaginal swabs were self-collected  
129 approximately every 6 months by subjects using Dacron swabs high within the vagina, placed in  
130 Digene transport media, and frozen at -80°C until use. Pap smears were taken at baseline and at  
131 least one other visit, and tests for HPV, *Trichomonas*, and BV performed [33]. HIV status was  
132 confirmed upon enrollment, and CD4+ T cell count for those who were HIV-positive was  
133 determined. Exclusion criteria included prior HPV vaccination or cervical surgery. Sexual history,  
134 recent contraceptive methods and current HIV treatment interventions were also queried at study  
135 entry.

136

## 137 **Bacterial 16S rRNA gene amplicon sequencing**

138 Total nucleic acid was extracted from 253 resuspended vaginal swab samples using the MagNA  
139 Pure Compact Nucleic Acid Isolation Kit (Roche) [33]. 16S rRNA gene amplicon sequencing was  
140 performed with primers specific to the V3-V4 region [34] followed by amplicon pooling, bead-  
141 based normalization and sequencing on the Illumina MiSeq platform at 312 bp paired-end reads  
142 (University of Rochester Genomics Research Center, UR GRC). Water processed similarly to  
143 samples and pre-defined bacterial mixtures (Zymo) were run as negative and positive controls,  
144 respectively. Eleven samples failed 16S rRNA gene amplification.

145

## 146 **Bacterial 16S rRNA gene amplicon analysis**

147 Raw data from the Illumina MiSeq was first converted into FASTQ format  $2 \times 312$  paired-end  
148 sequence files using the bcl2fastq program (v1.8.4) provided by Illumina. Format conversion was  
149 performed without de-multiplexing, and the EAMMS algorithm was disabled. All other settings  
150 were default. Reads were multiplexed using a configuration described previously [34]. The  
151 extract\_barcode.py script from QIIME (v1.9.1) [35] was used to split read and barcode sequences  
152 into separate files suitable for import into QIIME 2 (v2018.11) [36], which was used to perform  
153 all subsequent read processing and characterization of sample composition. Reads were  
154 demultiplexed requiring exact barcode matches, and 16S primers were removed allowing 20%  
155 mismatches and requiring at least 18 bases. Cleaning, joining, and denoising were performed using  
156 DADA2 [37]: reads were truncated (forward reads to 260 bps and reverse reads to 240 bps), error  
157 profiles were learned with a sample of one million reads per run, and a maximum expected error  
158 of two was allowed. Taxonomic classification was performed with custom naïve Bayesian  
159 classifiers trained on target-region specific subsets of the August, 2013 release of GreenGenes



160 [38]. Sequence variants that could not be classified to at least the phylum level were discarded.  
161 Sequencing variants observed fewer than ten times total, or in only one sample, were discarded.  
162 Vaginal samples with fewer than 10,000 reads and/or features present in less than 20 samples were  
163 discarded. Four samples and all negative controls did not achieve sufficient sequence variants for  
164 downstream analysis leaving 238 samples that were included in the final analysis. Phylogenetic  
165 trees were constructed using MAFFT [39] for sequence alignment and FastTree [40] for tree  
166 construction. For the purposes of diversity analyses, samples were rarefied to a depth of 10,000  
167 reads. Faith's PD and the Shannon index were used to measure alpha diversity, and weighted  
168 Unifrac [41] was used to measure beta diversity.

169

## 170 **Lactobacilli DNA Extraction and qPCR Analysis**

171 Known concentrations of *Lactobacillus iners* (ATCC 55195), *Lactobacillus crispatus* (ATCC  
172 33820) *Lactobacillus gasseri* (ATCC 33323), and *Lactobacillus jensenii* (ATCC25258) genomic  
173 DNA extracted using isopropanol precipitation, was used to measure the detection limit of the  
174 species-specific 16S rRNA gene qPCR assays and to generate standard curves for quantifying  
175 assay results. DNA was previously extracted from vaginal swabs as described in [42] and along  
176 with lactobacilli genomic DNA was quantified using the Qubit 4 flurometer (Invitrogen Inc.,  
177 Carlsbad, CA) with the Qubit dsDNA high-sensitivity assay (Invitrogen Inc., Carlsbad, CA). 10-  
178 fold serial dilutions ( $10^0$  to  $10^8$  copies) were used to generate standard curves of extracted genomic  
179 DNA. The range of slopes for the qPCR assays was from -3.7 to -4.7, and  $r^2$  values were all  $> 0.99$ .  
180  
181 qPCR primers targeting the 16S rRNA genes of *L. iners*, *L. crispatus*, *L. gasseri*, and *L. jensenii*  
182 were previously developed in [43]. SYBR green-based qPCR assays were performed on a CFX96

183 Touch Real-Time PCR Detection System (Bio-Rad, Hercules, CA). The reaction mixture (20  $\mu$ L)  
184 contained 10  $\mu$ L iQ SYBR Green Supermix (Bio-Rad), 2  $\mu$ L each of forward and reverse primers  
185 to a final primer concentration of 100 nM each except for the assay for *L. iners* which had used 4  
186  $\mu$ L each to a concentration of 200 nM., and 10  $\mu$ L template DNA (10 ng). Temperature cycling  
187 for all assays was polymerase activation at 95°C for 3 min, followed by 40 cycles of amplification  
188 with denaturation at 95°C for 15 seconds, followed by annealing/ extension at 55 to 58°C for 1  
189 min (*L. gasseri* , *L. iners* and *L. jensenii* at 55°C and *L. crispatus* at 58°C). Fluorescence was  
190 measured at the final step of each cycle. Following amplification, melting curve analysis was  
191 performed by heating at 0.5°C increments from 55 to 95°C, temperature was held for 5 s at each  
192 step, and fluorescence was acquired at each temperature increment. For each qPCR assay, vaginal  
193 swabs and extracted lactobacilli genomic DNA standards were run in triplicate, and the average  
194 values were used to calculate 16S rRNA gene copy number per 10 ng total vaginal swab DNA.  
195 Negative (no DNA water) controls were run with every assay to check for contamination.

196

### 197 **Virus-Like Particle Preparation, Library Construction and Sequencing**

198 Virus-like particle (VLP) preparation was adapted from methods previously described in [44].  
199 Briefly, vaginal specimens were resuspended in 200  $\mu$ L of Digene transport media and an equal  
200 volume of SM buffer was added (50mM Tris-HCl, 8mM magnesium sulfate, 100mM sodium  
201 chloride, and 0.01% gelatin, pH 7.5, Fisher) and mixed by vortexing for 5 minutes. Specimens  
202 were centrifuged at 2000 x g and filtered using a 0.45  $\mu$ M filter to remove intact cells and bacteria.  
203 Samples underwent lysozyme treatment (1ug/mL at 37C° for 30 minutes) (Sigma-Aldrich) to  
204 degrade remaining host cell and bacterial membranes. DNase digestion (Turbo DNase Buffer,  
205 Turbo DNase, Baseline Zero) (Ambion) was performed to remove contaminating bacterial and

206 host DNA followed by heat inactivation of the DNase at 75C° for 15 minutes. Enriched VLPs were  
207 lysed with 10% SDS and 20mg/mL Proteinase K (Ambion) at 56C° for 20 minutes, followed by  
208 treatment with CTAB (10% Cetyltrimethylammonium bromide, 0.5 M NaCl, nuclease-free water,  
209 filtered through 0.22 µM filter) at 65C° for 20 minutes. Phenol: Chloroform: Isoamyl Alcohol  
210 (Invitrogen, pH 8.0) nucleic acid extraction was performed, the resulting aqueous fraction then  
211 washed with an equal volume of chloroform and concentrated through isopropanol precipitation.  
212 Extracted nucleic acid was aliquoted and stored at -80C° until use. NEBNext Ultra II FS DNA  
213 Library Prep Kit (New England Biolabs) was used for library construction with NEBNext  
214 Multiplex Oligos for Illumina Dual Index Primers (New England Biolabs). Following equimolar  
215 pooling, DNA libraries were sequenced on the Illumina NovaSeq platform (UR-GRC) generating  
216 an average of over 29 million 150bp paired-end reads per sample.

217

## 218 **Virome Analysis Pipeline**

219 The VirusSeeker pipeline [45] was deployed on a Linux cluster on raw sequence data. Briefly, raw  
220 sequences from samples went through sample pre-processing steps that included adapter removal,  
221 stitching of reads, quality filtering, and CD-HIT was used to minimize sequence redundancy and  
222 define unique sequences (98% identity over 98% of the sequence length). Sequencing reads  
223 underwent human genome filtering, then unmapped reads were sequentially queried against a  
224 customized viral database comprised of all viral sequences in NCBI using BLASTn (e-value cutoff  
225 1E-10), followed by BLASTx (e-value cutoff: 1E-3). False positive viral sequences were  
226 identified by successively querying the candidate viral reads against the NCBI NT database using  
227 MegaBLAST (e-value cutoff: 1E-10), BLASTn (e-value cutoff: 1E-10), and the NCBI NR

228 database using BLASTx (e-value cutoff:  $1E-3$ ). All sequences that aligned to viruses were further  
229 classified into viral genera and species based on the NCBI taxonomic identity of the top hit.

230

## 231 **Statistical Analysis**

232 Descriptive statistics were used to summarize the characteristics of the study population. Mean  
233 was used for continuous variables, and frequency or proportion was used for categorical variables.

234 Alpha diversity was measured by Shannon's diversity index and analyzed using a linear mixed  
235 effects model for bacteria data and a linear regression model for bacteriophage data [46]. Beta

236 diversity was measured by the weighted UniFrac distance for bacteria data and by the Bray-Curtis  
237 distance for bacteriophage data [44, 47]. PERMANOVA was used to quantify dissimilarity in beta

238 diversity [48]. Clustering was performed using partitioning around medoids, with the number of  
239 clusters estimated by maximum average silhouette width [49]. For differential abundance analysis,

240 the relative abundance was first arcsine-transformed, and then univariate analysis was performed  
241 using mixed effects models for bacteria data and linear regression models for bacteriophage data.

242 Univariate analysis of correlations between bacteria and bacteriophage was performed using  
243 Kendall's rank correlation coefficient [50]. All analyses were performed in R and Prism version

244 8.3.0 for Windows (GraphPad Software, La Jolla California USA, [www.graphpad.com](http://www.graphpad.com)) [51]. *P*  
245 values in the univariate analyses were adjusted for multiplicity using the Benjamini-Hochberg

246 procedure [52].

247

## 248 **Results**

### 249 **Cohort Characteristics**

250 Fifty HIV-positive and 50 HIV-negative young, sexually active South African women ages 16-21  
 251 were recruited in Cape Town, South Africa between October 2012 and October 2014 as part of the  
 252 University of Cape Town HPV-HIV study to investigate high-risk HPV persistence in HIV-  
 253 positive women as previously reported [33, 42]. Vaginal swabs were self-collected at six-month  
 254 intervals for up to six consecutive visits along with medical and sexual history, laboratory data and  
 255 demographic information. Pap smears and STI testing were performed at the baseline visit and  
 256 each year. HIV-positive subjects had an average CD4+ T cell count of 477.5 cells/ $\mu$ L, and 22  
 257 (44%) were not on ART at the baseline study visit. There was an increased risk of HPV for HIV-  
 258 positive participants at baseline (OR 5.299, 95% CI 2.048 to 13.73). This cohort included 54 BV-  
 259 positive and 46 BV-negative subjects at baseline (Table 1). The median age of both BV-positive  
 260 and BV-negative women was 19. BV-positive subjects were more likely to have HPV ( $p=0.0940$ )  
 261 and a higher prevalence of high-risk HPV subtypes ( $p=0.0005$ ) compared to BV-negative subjects.  
 262 BV-positive subjects also exhibited higher rates of abnormal pap smears ( $p=0.1181$ ). These data  
 263 demonstrate that our cohort behaves similarly to other published cohorts and was suitable for  
 264 further study [53].

265

266 **Table 1: Cohort Characteristics**

| <b>Subject Characteristics</b>               | <b>BV Positive<br/>(n=54)</b> | <b>BV Negative<br/>(n=46)</b> | <b><i>p</i>-value</b> |
|----------------------------------------------|-------------------------------|-------------------------------|-----------------------|
| Age (years), mean (Interquartile range; IQR) | 19.2 (16-21)                  | 18.8 (16-21)                  | 0.2352                |
| <b>Laboratory Results</b>                    |                               |                               |                       |
| HIV Positive Samples, n (%)                  | 29 (53.70)                    | 21 (45.65)                    | 0.5475                |
| HPV Positive Samples, n (%)                  | 39 (60.94)                    | 25 (39.06)                    | 0.0940                |

|                                                        |            |           |         |
|--------------------------------------------------------|------------|-----------|---------|
| High Risk HPV Types Present in Positive Samples, n (%) | 29 (76.32) | 9 (23.68) | 0.0005  |
| Visits with Abnormal Pap Smear, n (%)                  | 13         | 5         | 0.1181  |
| <b>Smoking History</b>                                 |            |           |         |
| Smoker, n (%)                                          | 5 (5)      | 4 (4)     | >0.9999 |
| Non-Smoker, n (%)                                      | 49 (49)    | 42 (42)   |         |
| <b>Sexual History</b>                                  |            |           |         |
| History of STI, n (%)                                  | 27 (57.45) | 20 (42.5) | 0.5514  |
| Lifetime Sexual Partners                               |            |           |         |
| 1, n (%)                                               | 11 (11)    | 4 (4)     |         |
| 2-5, n (%)                                             | 39 (39)    | 39 (39)   | 0.2482  |
| >5, n (%)                                              | 4 (4)      | 3 (3)     |         |
| Sexual Partners in the Last 6 Months                   |            |           |         |
| 1, n (%)                                               | 51 (51)    | 44 (44)   | >0.9999 |
| 2-5, n (%)                                             | 3 (3)      | 2 (2)     |         |
| Form of Contraception                                  |            |           |         |
| None, n (%)                                            | 1 (1)      | 1 (1)     |         |
| Condom, n (%)                                          | 50 (50)    | 40 (50)   | 0.3712  |
| Injection, n (%)                                       | 30 (30)    | 31 (31)   |         |
| Pill, n (%)                                            | 2 (2)      | 3 (2)     |         |

267 HIV viral load and HAART regimen not available for HIV-negative subjects, 22 (44%) HIV-positive participants on  
 268 HAART. High risk HPV include 16, 18, 31, 33, 35, 39, 45, 51, 52, 56, 58, 59, 68, 73 and 82. For continuous variables,  
 269 Mann-Whitney and Kruskal Wallis tests were used; for comparing categorical variables, Chi-square and Fisher's exact  
 270 tests were used.

271

272 **The FRT bacteriome clusters into community groups**

273 Prior studies examining Western cohorts have identified five bacterial community state types  
274 (CSTs), of which type I-III and V were *Lactobacillus*-dominant while CST IV was comprised of  
275 polymicrobial communities [7]. However, studies examining the FRT bacteriome in African  
276 cohorts have revealed a different pattern in hierarchical clustering analysis, with more community  
277 groupings of high diversity bacteriomes, consistent with the increased prevalence of high diversity  
278 FRT bacteriomes in this population [4, 54]. To further assess the bacterial communities within the  
279 FRT bacteriome seen in African women, 253 vaginal swabs were processed and underwent 16S  
280 rRNA gene amplicon sequencing of the V3-V4 region [34]. Eleven samples did not amplify, and  
281 four failed to achieve sufficient reads for downstream analysis, leaving 238 samples for bacteriome  
282 analysis and sequence identification using QIIME2 (Fig. 1A).

283  
284 Hierarchical clustering analysis of all visits by community abundance and composition identified  
285 five unique bacterial community clusters named herein bacterial community groups (CG), which  
286 were distinguished by *Lactobacillus*-dominance (CG1 and 2) or higher diversity bacteriomes  
287 (CG3-5; Fig. 1A). The identified CG were compositionally different from conventional CSTs [7].  
288 Similar to other African cohorts [7], the majority (n=173, 72.7%) of subjects had high diversity  
289 FRT bacteriomes with a low prevalence of *Lactobacillus*-dominant bacteriomes. Samples that  
290 were dominated by a single species, defined as >50% community composition, made up 42.0% of  
291 all samples and mostly clustered with CG1 and 2, while the remaining samples showed no  
292 individual dominant species and mainly clustered in CG3-5. CG1 (n=15, 6.3%), a low diversity  
293 FRT bacteriome, was comprised almost exclusively of *Lactobacillus* species (78%) that were  
294 unable to be further delineated by 16S rRNA gene amplicon sequencing (Fig. 1B). To further  
295 define the primary bacterial constituents of CG1, qPCR of 16S rRNA gene sequences from

296 dominant FRT *Lactobacillus* species *L. iners*, *L. crispatus*, *L. gasseri* and *L. jensenii* [8, 54] was  
297 performed, revealing that approximately 70% of samples in GC1 were *L. crispatus*-dominant,  
298 similar to what has been previously described as CST I [55] (Fig. 1C). One vaginal swab in CG1  
299 contained sufficient volume to only perform qPCR for *L. iners* and *L. crispatus*, and *L. crispatus*  
300 was most abundant (not shown). *L. jensenii* tended to predominate when present (Fig. 1C). CG2  
301 (n=54, 22.7%) was *L. iners*-dominant, with a few samples showing notable amounts of  
302 *Gardnerella* and *Prevotella* as well (Fig. 1B). The second to largest and most diverse group, CG3  
303 (n=64, 26.9%), consisted mainly of *Gardnerella*, *Prevotella* and *L. iners* (Fig. 1B). The smallest  
304 high diversity CG was CG4 (n=30, 12.6%), in which *Shuttleworthia* and *Gardnerella* were  
305 predominant. CG5 contained the largest number of samples (n=75, 31.5%) and was dominated by  
306 *Sneathia* and *Prevotella* (Fig. 1B). CG3, CG4 and CG5 exhibited significantly higher alpha  
307 diversity than CG1 and 2 (Fig. 2A;  $p = 0.0001$ ,  $0.0065$ , and  $<0.0001$  respectively). Beta-diversity  
308 significantly differed between these five bacterial CG ( $p=0.0001$ ; Fig. 2B).



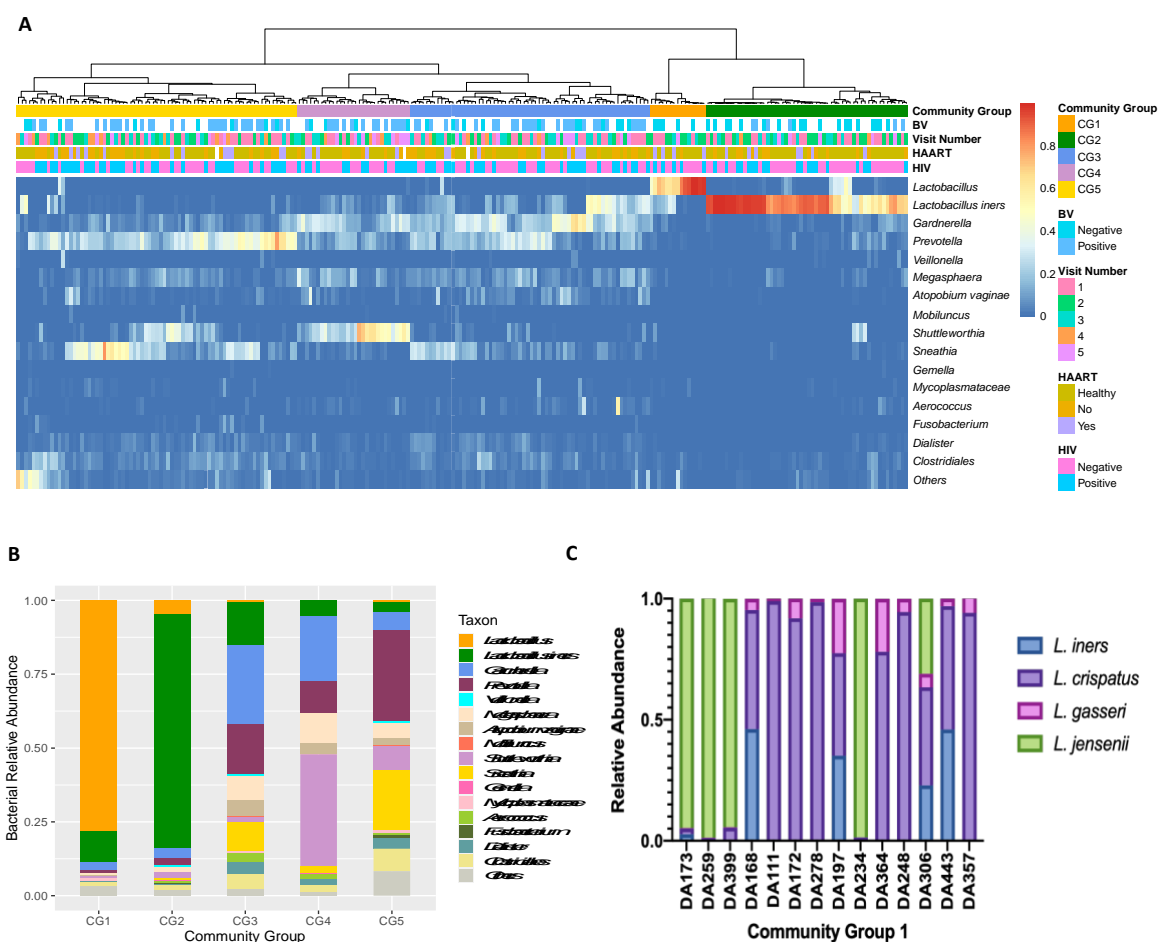

309  
 310 **Figure 1: Bacteriome Profiling by Community Group of Self-Collected Vaginal Swabs from**  
 311 **South African Women.** (A) Relative abundance of 16 most frequent bacterial taxa (y-axis) by  
 312 sample (x-axis), grouped by community group (CG), BV Status, visit number, HAART status and  
 313 HIV status (color key shown). Percent abundance is indicated by gradient key. Using Ward's  
 314 linkage hierarchical clustering, samples clustered into five distinct bacterial community profiles  
 315 called community groups (CG). (B) Average bacterial community group structure for each of the  
 316 five community groups (x-axis) based on relative abundance (y-axis). (C) Bar plot showing the  
 317 relative abundance of *L. iners*, *L. crispatus*, *L. gasseri* and *L. jensenii* bacterial species (relative

318 abundance of 16S rRNA copies per 10 ng total DNA) as determined by qPCR of vaginal swabs  
319 that clustered into CG1.

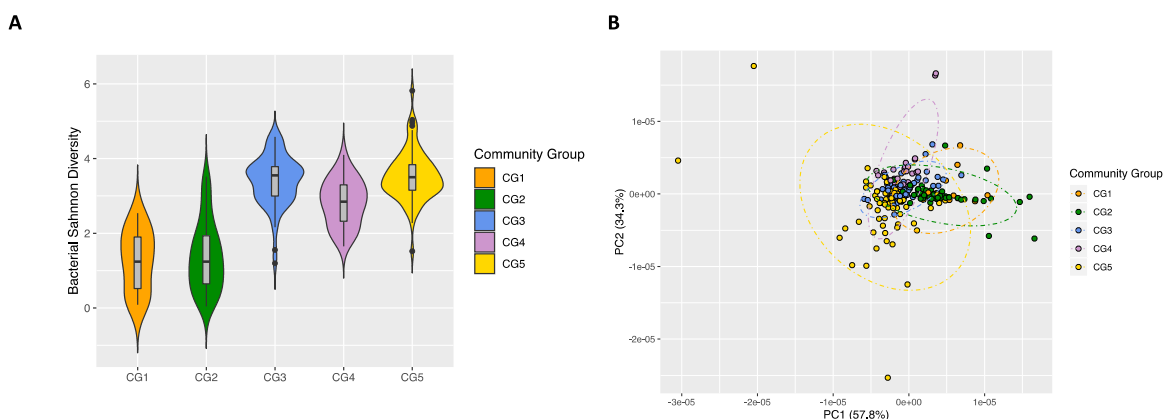

320  
321 **Figure 2: FRT Bacteriome Clusters into Distinct Community Groups That Differ by Alpha**  
322 **and Beta Diversity.** (A) Bacterial Shannon diversity (y-axis) by CG (x-axis) as determined by  
323 linear mixed effects model. Center bar represents median; grey box bounded by upper/lower  
324 interquartile ranges (IQR); Whiskers represent range; Dots represent outliers; Color-filled areas  
325 are representative of density/distribution of diversity values. (B) Principle Coordinate Analysis  
326 (PCoA) plot of the weighted UniFrac distances colored by community group.

### 327 328 **Bacteriophages comprise the majority of the FRT DNA virome**

329 While the FRT bacteriome has been well-studied, the FRT virome, especially bacteriophage  
330 populations, is relatively unknown. We therefore characterized the FRT DNA virome using a  
331 subset of baseline samples by enriching for virus-like particles (VLPs) from resuspended vaginal  
332 swabs and extracting viral nucleic acid [44]. Libraries were constructed and sequenced using the  
333 Illumina NovaSeq platform for 38 baseline samples, 14 of which were BV-negative and 24 were  
334 BV-positive. Resulting viral sequences underwent quality control, removal of bacterial and human

335 reads, and then were assigned to known viral taxa using VirusSeeker, a BLAST-based NGS virome  
336 analysis pipeline [45].

337

338 On average there were 29 million reads per sample with 86.8% of them being high quality. The  
339 DNA eukaryotic virome was comprised almost entirely of *Papillomaviridae*. However, FRT  
340 bacteriophages were abundant. Samples contained sequences identified as belonging to  
341 *Myoviridae*, *Siphoviridae*, *Podoviridae*, *Inoviridae*, *Ackermannviridae*, *Microviridae*,  
342 *Lipothrixviridae*, *Plasmaviridae* and *Tectiviridae* bacteriophage families. Sequences assigned to  
343 members of the *Caudovirales* order, lytic tailed dsDNA bacteriophages, including *Myoviridae*,  
344 *Siphoviridae* and *Podoviridae*, were the most abundant in all samples regardless of BV, HAART,  
345 or HIV status.

346

347 Bacteriophage communities within the FRT clustered into two distinct, novel bacteriophage  
348 community groups based on composition and abundance that we have termed viral state types  
349 (VSTs) (Fig. 3A). VST1 represented 44.7% (n=17) of all samples while VST2 contained the  
350 remaining 55.3% (n=21). Bacteriophage Shannon diversity differed between VSTs (Fig. 3B), with  
351 VST2 having the highest diversity bacteriophage populations. The VSTs also grouped distinctly  
352 by beta diversity analysis (Fig. 3C, PERMANOVA,  $p=0.0001$ ). Neither VST exhibited a dominant  
353 bacteriophage member. VST1 contained several samples with high relative abundance of  
354 *Rhodococcus viruses*, *Spounavirinae*, *phi29 virus* and *Biseptimavirus*-assigned bacteriophage  
355 reads. VST2 was comprised of a more even distribution. This is the first study to identify  
356 bacteriophage community groups in the FRT.

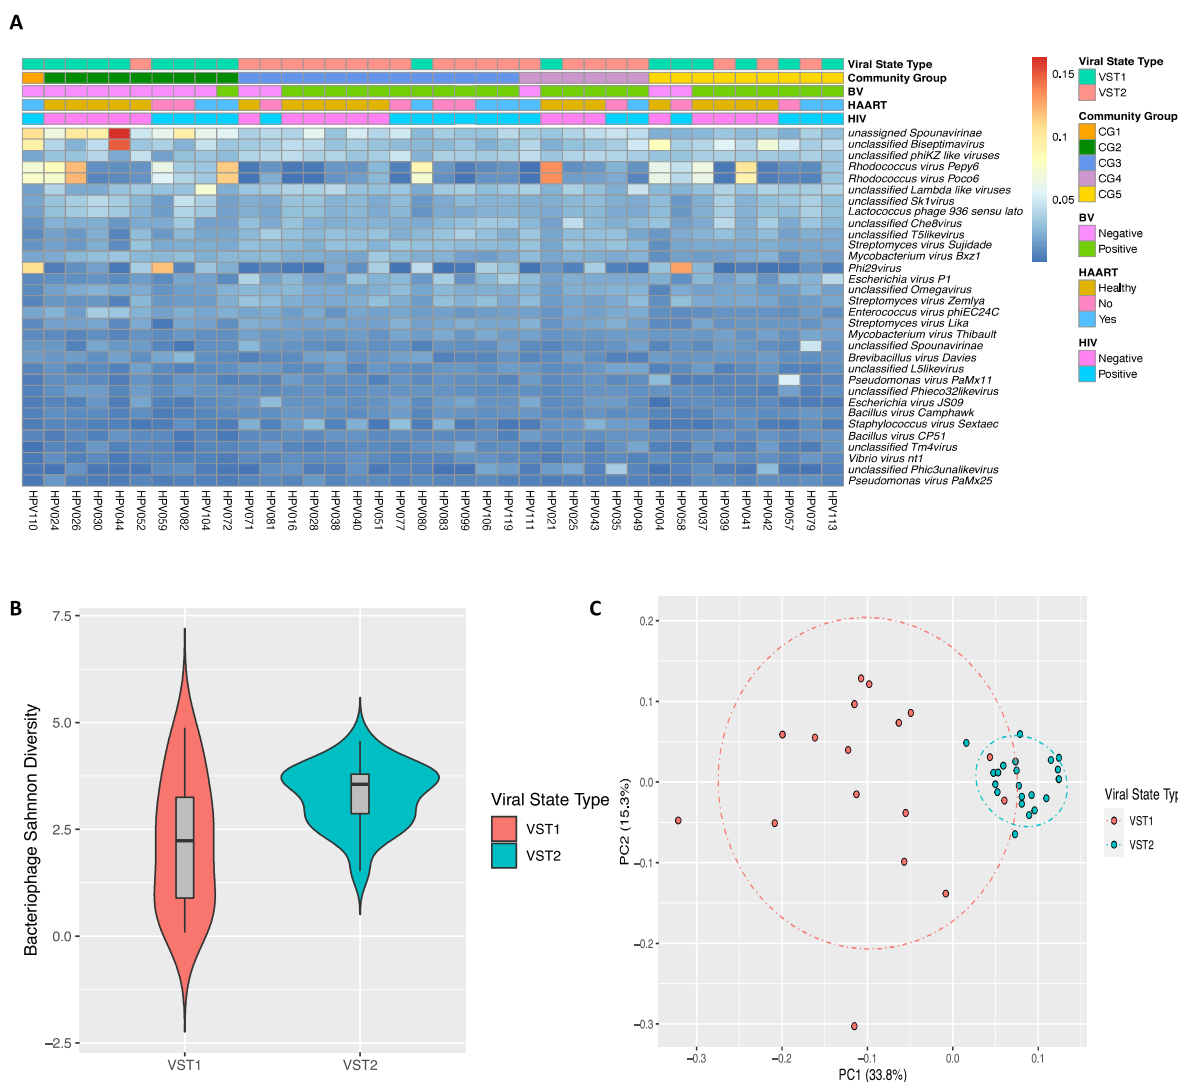

357  
 358 **Figure 3: FRT DNA Bacteriophages Cluster into Two Unique Community Groups.** Self-  
 359 collected vaginal swabs were processed for DNA virome analysis by enriching for viral nucleic  
 360 acid, libraries built, and sequenced. (A) Relative abundance of the 32 most frequent bacteriophage  
 361 species (y-axis) by sample (x-axis). Ward's linkage hierarchical clustering analysis was used to  
 362 cluster samples into distinct bacteriophage community profiles called viral state types (VSTs).  
 363 VST, BV Status, HAART status and HIV status (color key) are shown. Percent abundance is  
 364 indicated by gradient key. (B) Bacteriophage Shannon diversity (y-axis) by VST (x-axis) as  
 365 determined by linear regression model. Center bar represents median; grey box is bounded by

366 upper/lower interquartile ranges (IQR); whiskers represent range; dots represent outliers; color-  
367 filled areas are representative of density/distribution of diversity values. (C) Principle Coordinate  
368 Analysis (PCoA) plots of beta diversity distances, as determined by Permutational multivariate  
369 analysis of variance, colored by VST.

370

## 371 **Transkingdom Associations within the FRT Microbiome of South African** 372 **Women**

373 Bacteriophage can directly impact bacterial composition and abundance through infection of their  
374 host. Therefore, we investigated the transkingdom associations between bacteriophage and  
375 bacteria in the FRT. The VSTs significantly correlated with bacterial CG ( $p=0.00015$ ; Fig. 3A),  
376 with VST1 associated with CG1 and 2, the *Lactobacillus*-dominant groups, and VST2 associated  
377 with CG3 and 4, both higher diversity CG. CG5 contained samples belonging to both VSTs (Fig.  
378 3A). These data indicate a strong association between bacteriophage communities and the host  
379 bacterial populations.

380

381 To further investigate specific bacteriophage-bacterial interactions, correlations between FRT  
382 bacterial composition and bacteriophage composition were identified by Kendall's rank  
383 correlation coefficient. Reads assigned to bacteriophages *Bacillus virus Camphawk* and *Bacillus*  
384 *virus Pony*, which infect members of the *Bacillus* genus, positively correlated with the BV-  
385 associated bacteria *Gardnerella*, *A. vaginae*, *Prevotella*, *Sneathia* and *Dialister* (Fig. 4). Reads  
386 assigned to unclassified bacteriophages of the *E125* genus also positively associated with  
387 *Gardnerella* and *A. vaginae* (Fig. 4). A number of *Bacillus*-infecting phage including, *Bacillus*  
388 *virus Pony* and *Bacillus virus Staley*, were inversely associated with bacteria protective from BV,

389 particularly *L. iners* (Fig. 4). Interestingly, in this cohort, bacteriophage associations revealed  
390 *Veillonella* more closely grouped with *Lactobacillus* rather than BV-associated bacteria despite  
391 the known role of *Veillonella* in lactose fermentation and higher diversity FRT microbiomes [7].  
392 These data suggest that bacteriophages directly or indirectly interact with FRT bacterial  
393 populations in disease states, and identify putative FRT bacteriophage-host networks that may play  
394 a role in development and maintenance of BV.

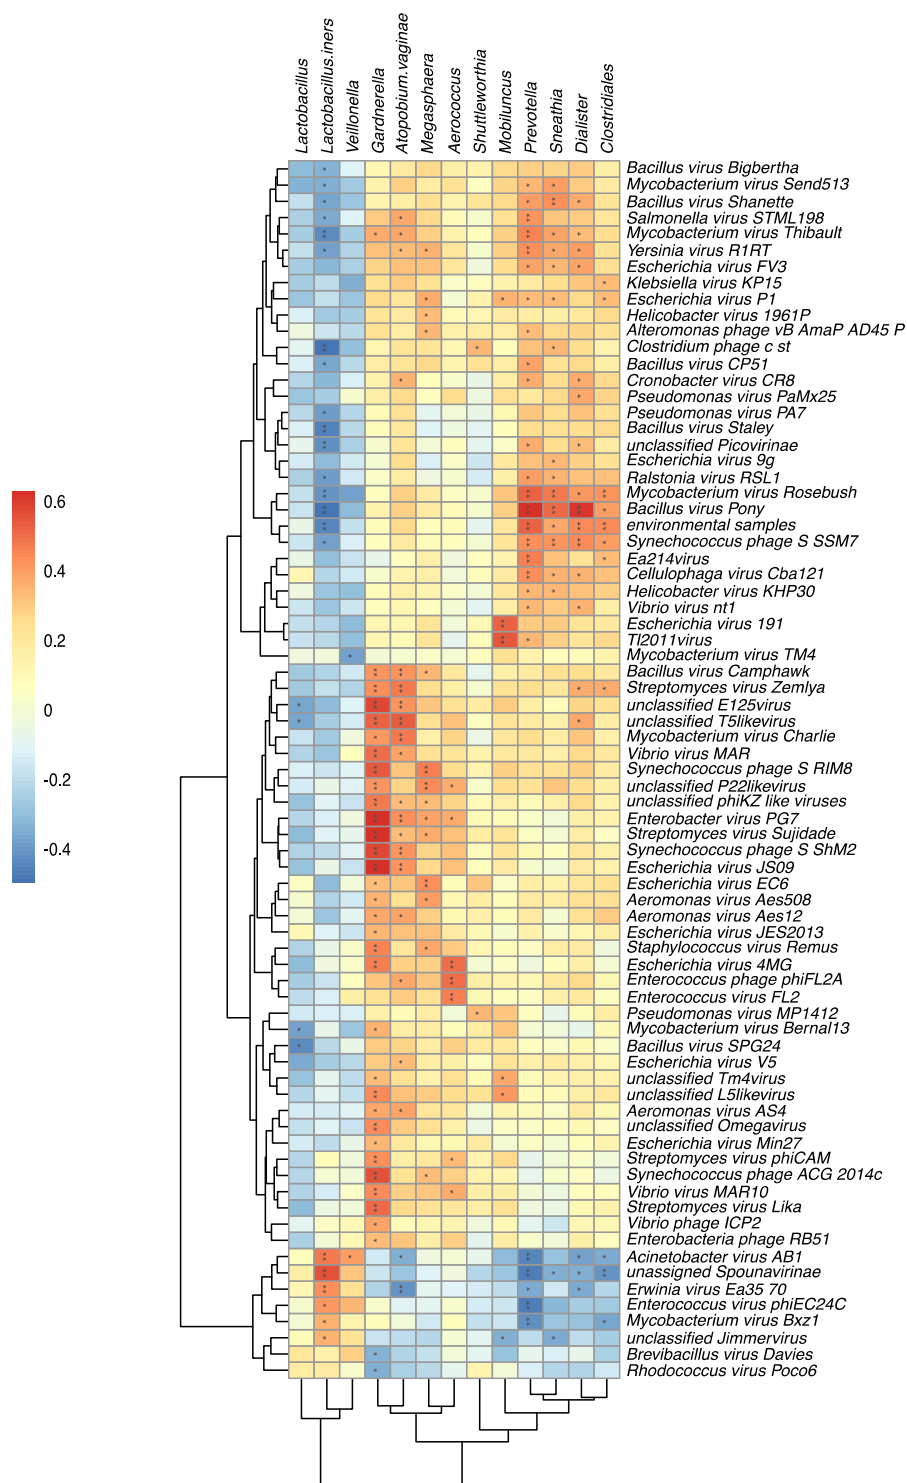

396 **Figure 4: Transkingdom Associations within the FRT of South African Women.** Heatmap of  
397 estimated Kendall's correlation coefficients between FRT bacterial taxa (x-axis) and sequences  
398 assigned to bacteriophage (y-axis). Multiple comparisons correction by the Benjamini-Hochberg  
399 procedure. \* indicates  $p < 0.05$ , \*\*  $p < 0.01$ . Magnitude and sign of the Kendall's rank correlation  
400 coefficient is indicated by gradient key. Red indicates positive correlations; blue indicates negative  
401 correlations.

402

### 403 **Effects of Bacterial Vaginosis on the FRT Virome**

404 We next examined the impact of different disease states on this cohort. BV is a clinically  
405 significant condition with high morbidity characterized by high bacterial diversity [12, 13]. Our  
406 data showed significant associations between high diversity bacterial CG and VSTs, and further  
407 suggested specific bacteriophage interactions with BV-associated bacteria. Similar to published  
408 cohorts [2], BV in our cohort was positively associated with increased bacterial alpha diversity  
409 compared to healthy subjects ( $p=0.0001$ ). The high diversity CG3-5 ( $p=0.0001$ ) also correlated  
410 positively with BV. Bacterial taxa including *Gardnerella*, *Prevotella*, *Sneathia* and *Megasphaera*  
411 ( $p=0.000439$ ; Fig. 5A) were linked to clinical BV status, corroborating distinct bacterial signatures  
412 associated with BV. Of particular clinical relevance, we additionally sought to identify specific  
413 bacterial taxa that were predictive of initiation and recovery from BV. Relative abundance of  
414 bacterial genera less frequently observed in clinical BV, *Aerococcus* ( $p=0.00216$ ) and *Gemella*  
415 ( $p=0.00746$ ), was significantly increased among participants who recovered from or transitioned  
416 to BV, suggesting members of this genera as possible regulators of FRT bacteriome structure in  
417 health and BV.

418



419 Since clinical BV was associated with significant changes in FRT bacterial composition and  
420 correlated with bacterial CG, and bacteriophage VSTs also correlated with bacterial CG, we  
421 sought correlations between bacteriophage populations and clinical BV. Regression analysis  
422 accounting for HIV status and VST revealed bacteriophage Shannon diversity significantly  
423 differed by clinical BV diagnosis ( $p=0.0193$ ) (Fig. 5B). We then identified specific  
424 bacteriophage taxa differentially abundant in the FRT of BV-positive and -negative women.  
425 *Bacillus*-infecting bacteriophages are known to belong to the *Herelleviridae* and *Podoviridae*  
426 families [56, 57]. Members of these families, including *Bacillus virus Camphawk* and *Bacillus*  
427 *virus Pony* (Fig. 5C), which were significantly associated with BV diagnosis ( $p= 0.019058$  and  
428  $p=0.014546$ , respectively). BV diagnosis also strongly correlated with the bacteriophages  
429 *Escherichia virus FV3* and *unclassified E125 virus*, which are known to infect the BV-associated  
430 bacteria *Escherichia coli* and *Burkholderia*, respectively [58, 59]. Together, these data uncover a  
431 link between highly diverse FRT bacteriophage populations, a distinct subset of bacterial hosts,  
432 and BV.



434 **Figure 5: Discriminant FRT Bacterial and Bacteriophage Species Associated with Bacterial**  
435 **Vaginosis.** (A) Discriminant bacterial taxa by BV status was determined by univariate analysis  
436 using mixed effects models. Relative abundance is represented on the y-axis, BV-negative subjects  
437 are shown in orange and BV-positive in green (x-axis). (B) Bacteriophage Shannon diversity (y-  
438 axis) by BV status (x-axis) as determined by a linear regression model. (C) Discriminant  
439 bacteriophage species by clinical BV diagnosis was determined by univariate analysis using a  
440 linear regression model. Relative abundance is represented on the y-axis, BV-negative subjects are  
441 shown in green and BV-positive in orange (x-axis).

442

#### 443 **The Effect of HIV and HPV on the FRT Microbiome**

444 We also examined the effect of HIV on the FRT microbiome in this cohort. We found no  
445 significant difference in bacterial richness, alpha or beta diversity between HIV-positive and HIV-  
446 negative subjects. Further, there were no significant alterations in bacteriome or bacteriophage  
447 diversity by HIV status. Thus, FRT bacterial and bacteriophage communities were not detectably  
448 altered by HIV infection in this cohort, suggesting that localized infections may play a more  
449 important role in the FRT composition than systemic infections.

450

451 We also examined the relationship between HPV, the main eukaryotic virus found, and bacterial  
452 populations. Upon examination of 63 HPV-positive and 37 HPV-negative baseline samples, there  
453 were no significant associations between HPV infection and bacteriophage or bacterial diversity.  
454 Analysis of HPV subtypes revealed increased bacterial alpha diversity in HPV6-positive subjects  
455 ( $p=0.0181$ ), suggesting certain HPV subtypes may directly or indirectly benefit from the presence

456 of higher diversity bacterial populations, although this analysis may have been underpowered for  
457 less prevalent subtypes.

458

## 459 **Discussion**

460 The FRT is a dynamic ecosystem in which bacteriophage and bacterial communities establish  
461 complex connections that influence the host environment and the physical manifestation of  
462 gynecological diseases. Bacterial population shifts are well-established contributors to FRT  
463 disease states including BV [7]. However, whether shifts in the FRT viral community occur in  
464 disease states concurrently with bacterial community perturbation was unknown. This study is the  
465 first to offer a comprehensive characterization of both the FRT bacteriome and DNA virome, with  
466 a particular emphasis on bacteriophage composition and transkingdom interplay, utilizing a South  
467 African cohort of BV-affected women.

468

469 Globally, the most common clinical presentation of vaginal bacterial dysbiosis is BV, a condition  
470 which poses a significant threat to female reproductive health and STI acquisition [2, 12, 13]. Here,  
471 similar to other studies, we find that women suffering from BV have distinct and compositionally  
472 diverse FRT bacteriomes defined by a loss of *Lactobacillus* dominance and gain of facultative  
473 anaerobes [7]. However, for the first time, our data revealed novel bacteriophage communities we  
474 have termed VSTs, which correlated to bacterial communities and clinical diagnosis of BV.  
475 Although bacteriophages have been studied at other mucosal sites in humans including the gut  
476 [60], this is the first description of bacteriophage community groupings and may be unique to the  
477 FRT environment due to the distinctive bacterial communities present. Few prior studies have  
478 examined the bacteriophage populations in the FRT. Nonetheless, in contrast to our findings, one

479 group examining FRT bacteriophage populations found no distinct bacteriophage community  
480 structures within their cohort, nor differences in bacteriophage composition among the bacterial  
481 communities [4]. Similar to our study, they also utilized a South African cohort; however, they  
482 focused analysis on the *Caudovirales* family rather than all bacteriophage populations, which  
483 likely impacts differences observed. Additionally, our findings contrast with those previously  
484 described by Jakobsen et. al [23], who found no significant difference in viral nor bacterial alpha  
485 diversity between BV-positive and BV-negative samples in a cohort of Danish women undergoing  
486 IVF treatment for non-female factor infertility. However, their analysis was limited by the cross-  
487 sectional nature of the study and meager modest sequencing depth. Our viral sequencing depth of  
488 29 million reads per sample was greater than 640-fold higher than that employed in Jakobsen et  
489 al. (average of 44,686 reads per sample) and is likely a major contributor to our unique findings.  
490 Additionally, Zhang et al. briefly characterized the vaginal microbiome in pregnant women finding  
491 absence of Microviridae and Herelleviridae in a pregnant woman without vaginitis [24]. This study  
492 was limited in statistical analysis due to the pooling of subjects into size sequencing libraries and  
493 similar to Jakobsen et al., Zhang et al. used a sequencing depth an order of magnitude lower than  
494 what was employed in our current investigation. Validation of our novel FRT VSTs using other  
495 cohorts is currently underway.

496  
497 As the etiology of rapid microbiome shifts between health and BV disease states remains unclear,  
498 we sought to identify specific bacterial taxa associated with recovery and transition to BV that  
499 could be involved in these dynamic changes. We observed a significant increase in relative  
500 abundance of the gram-positive facultatively anaerobic cocci *Aerococcus* and *Gemella* during  
501 transition to and from clinical BV. However, previous literature has recognized these bacterial

502 genera as being less frequently detected during clinical BV [61]. This could indicate these taxa as  
503 important facilitators of disease-associated microbiome composition and as clinical biomarkers of  
504 BV. Similar to what is seen in the gut, these bacteria may be assuming the role of “primary species”  
505 commonly seen after an environmental disturbance, whereby fast-growing facultative anaerobes  
506 transiently bloom and are essential for the presence of other taxa along with ecological diversity  
507 and structure [62]. Interestingly, *Enterococcus virus FL2 A* and *Enterococcus phage phiFL2A* both  
508 were found to be significantly associated with the transitory bacteria *Aerococcus*. Because of the  
509 sequence similarity between *Aerococcus* and *Enterococcus* bacteria, along with the identification  
510 of these bacteriophage prior to the introduction of more sensitive next generation sequencing  
511 technologies, it is probable that *Enterococcus virus FL2 A* and *Enterococcus phage phiFL2A* have  
512 a misidentified host [63]. These bacteriophages may actually target *Aerococcus* species,  
513 facilitating their significant role in recovery and transition to BV. A larger longitudinal patient  
514 population would be needed to further distinguish between specific taxa associated solely with BV  
515 incidence vs BV recovery and the roles they play in these FRT microbiome transitions.

516

517 Our analysis also is the first to identify discriminant bacteriophage taxa by BV status and assess  
518 transkingdom associations in the FRT. Correlation analysis between bacterial taxa and assigned  
519 bacteriophage species identified bacteriophages that positively correlated with BV-associated  
520 bacteria and inversely correlated with *Lactobacillus*, suggesting that transkingdom interactions  
521 between bacteriophages and bacterial species could be the driver of BV-associated bacterial  
522 community alterations. *Bacillus virus Camphawk* and *Bacillus virus Pony*, previously  
523 demonstrated to be lytic to *Bacillus* members [64, 65], were associated with both BV and BV-  
524 associated bacteria. In the gut, *Bacillus* strains have been shown to antagonize enteropathogenic

525 bacteria, while concurrently promoting the growth of *Lactobacillus* [66]. If *Bacillus* species act in  
526 a similar manner in the FRT, the lytic nature of the *Bacillus* bacteriophages *Bacillus virus*  
527 *Camphawk* and *Bacillus virus Pony* could at least partially explain the shift in vaginal microbiota  
528 away from *Lactobacillus* species and toward more diverse bacterial species, including the  
529 facultative anaerobes seen in BV. *E. coli* and *Burkholderia* bacteriophages *Escherichia virus FV3*  
530 and *unclassified E125* virus, respectively, were also associated with BV. While less predominant  
531 than other bacterial species, *E. coli* and *Burkholderia* are also implicated in BV-associated  
532 bacterial communities [1, 2, 58]. *Escherichia virus FV3* and *unclassified E125* virus may act to  
533 regulate bacterial abundance and community composition in BV via a predator-prey relationship  
534 to allow for growth of primary BV-associated bacterial members such as *Gardnerella* and  
535 *Prevotella* [22, 67]. BV risk factors such as new or multiple sexual partners provide a plausible  
536 mechanism for introduction of novel bacteriophage that could target and deplete commensal FRT  
537 bacteria [68, 69].

538  
539 Interestingly, we did not find any significant association between sequences assigned to  
540 bacteriophage known to infect the more common BV-associated bacteria, including *Gardnerella* or  
541 *Prevotella*, by either BV-discriminant taxa or transkingdom analysis. The absence of  
542 bacteriophage that infect hallmark BV bacteria such as *Gardnerella vaginalis* in our analysis may  
543 be attributable to the high proportion of *Gardnerella* species that contain CRISPR/Cas-9  
544 bacteriophage defense loci, making them more resistant to bacteriophage infection and  
545 establishing a uneven bacteriophage burden between bacteria in BV [70]. These data suggest a  
546 very active, dynamic environment of bacteriophage warfare against numerous bacterial hosts to  
547 regulate the bacterial populations. Further *in vitro* studies will be necessary to determine host range

548 and bacteriophage lifestyle. A thorough examination of the FRT microbiome in the context of BV  
549 contributes to a deeper understanding of BV pathogenesis.

550

551 While we focused on BV as a common FRT-localized disease, we also were interested in  
552 investigating the effect of other disease states on the FRT microbiome. In addition to BV, we  
553 studied the impact of HIV infection on the FRT but observed no difference in FRT bacterial or  
554 bacteriophage diversity based on HIV status. One possible explanation is that HIV, as a systemic  
555 disease, does not have a major impact on the localized FRT mucosal environment. Prior literature  
556 shows that acute HIV infection leads to distinct changes in local inflammatory marker profiles,  
557 including elevation of pro-inflammatory cytokines IL-1 $\alpha$ , IL-1 $\beta$ , and IL-6 [4, 54] however, it  
558 remains unclear if this initial inflammatory response persists long-term. Alternatively, we may not  
559 have detected differences due to the well-controlled nature of HIV infection in this cohort. We  
560 previously showed that immunocompromise was a major factor affecting enteric microbiome  
561 diversity in HIV infection [44], a finding replicated at other mucosal sites [71], suggesting  
562 increased likelihood of observing microbiome alterations with immunodeficiency. Since the mean  
563 CD4<sup>+</sup> T cell count for this cohort was 478 cells/ $\mu$ L, and no subjects were known to be  
564 immunosuppressed, this could explain the dearth of associations of the FRT microbiome with HIV  
565 seen in our study.

566

567 Limitations to this study include the cross-sectional nature of the virome analysis, preventing  
568 speculation on the longitudinal impact of bacteriophage changes, and low RNA integrity of the  
569 samples, blocking assessment of the FRT RNA virome. The initial limited patient consent also



570 precluded significant *in vitro* validation of bacteriophage-bacterial pairs. Finally, there may be  
571 inaccuracies or biases in sequence assignments.

572

## 573 **Conclusions**

574 In this retrospective longitudinal study, we performed a novel in-depth investigation of the FRT  
575 virome and bacteriome using a cohort of young, sexually active, South African women. We  
576 discovered significant alterations in FRT bacterial and bacteriophage diversity and community  
577 structure associated with BV. Transkingdom analysis revealed associations of specific  
578 bacteriophages with bacteria protective of and associated with BV. This study is the first to  
579 describe VST structure within the FRT and its associations with bacterial diversity and  
580 composition. The nature of the FRT in health and disease is both complex and dynamic and our  
581 findings provide insight into putative interactions between bacteriophage and bacteria that may  
582 contribute to development and maintenance of FRT dysbiosis. Further studies are needed to  
583 investigate direct mechanisms employed by bacteriophages to promote dysbiosis.

584

## 585 **List of abbreviations**

586 BV: Bacterial Vaginosis

587 CG: Bacterial Community Group

588 HIV: Human Immunodeficiency Virus

589 FRT: Female Reproductive Tract

590 NGS: Next Generation Sequencing

591 STI: Sexually Transmitted Infection

592 VST: Viral State Type

593

## 594 **Conflicts of Interest**

595 The authors declare that they have no conflicts of interests.

596

## 597 **Ethics approval and consent to participate**

598 This study was reviewed by the Research Subjects Review Board of the University of Rochester

599 and granted human exemption status.

600

## 601 **Informed Consent**

602 Informed consent was obtained from all subjects involved in the study

603

## 604 **Authors' contributions**

605 Conceptualization and Methodology: CLM and FSM; Formal Analysis – MS and AG;

606 Investigation: FSM, BB, AW; Resources and Sample Acquisition: TM, ALW, LGB, DHA; Data

607 curation: FSM, BB, AW; Writing – original draft: FSM; Writing – reviewing and editing: all

608 authors; Visualization: FSM, MS, AG; Supervision: CLM; Funding acquisition: CLM.

609

## 610 **Funding**

611 This research was supported in part by a grant from the University of Rochester Center for AIDS

612 Research (CFAR), an NIH-funded program (P30AI078498). The content is solely the

613 responsibility of the authors and does not necessarily represent the official views of the National

614 Institutes of Health. FM was a recipient of a National Institutes of Health HIV T32 Training Grant  
615 AI1049815.

616

## 617 **Acknowledgments**

618 We thank the study subjects for their participation as well as study team nurses and personnel. We  
619 also would like to thank James Java, Ph.D. for assistance with the VirusSeeker virome pipeline  
620 and Cassandra Newkirk for experimental support. We thank the Center for Integrated Research  
621 Computing (CIRC) at the University of Rochester for providing computational resources and  
622 technical support. Microbiome and virome sequencing in this study was completed by the  
623 University of Rochester Genomics Research Center (GRC).

624

625

626

## REFERENCES

627

628 [1] H. W. Virgin, "The virome in mammalian physiology and disease," *Cell*, vol. 157, no. 1,  
629 pp. 142-50, Mar 27 2014, doi: 10.1016/j.cell.2014.02.032.

630 [2] C. Ceccarani *et al.*, "Diversity of vaginal microbiome and metabolome during genital  
631 infections," (in eng), *Sci Rep*, vol. 9, no. 1, p. 14095, Oct 2019, doi: 10.1038/s41598-019-  
632 50410-x.

633 [3] M. I. Petrova, M. van den Broek, J. Balzarini, J. Vanderleyden, and S. Lebeer, "Vaginal  
634 microbiota and its role in HIV transmission and infection," *FEMS microbiology reviews*,  
635 vol. 37, no. 5, pp. 762-92, Sep 2013, doi: 10.1111/1574-6976.12029.

- 636 [4] C. Gosmann *et al.*, "Lactobacillus-Deficient Cervicovaginal Bacterial Communities Are  
637 Associated with Increased HIV Acquisition in Young South African Women," *Immunity*,  
638 vol. 46, no. 1, pp. 29-37, Jan 17 2017, doi: 10.1016/j.immuni.2016.12.013.
- 639 [5] S. Greenbaum, G. Greenbaum, J. Moran-Gilad, and A. Y. Weintraub, "Ecological  
640 dynamics of the vaginal microbiome in relation to health and disease," (in eng), *Am J*  
641 *Obstet Gynecol*, vol. 220, no. 4, pp. 324-335, 04 2019, doi: 10.1016/j.ajog.2018.11.1089.
- 642 [6] J. P. Brooks *et al.*, "Changes in vaginal community state types reflect major shifts in the  
643 microbiome," (in eng), *Microb Ecol Health Dis*, vol. 28, no. 1, p. 1303265, 2017, doi:  
644 10.1080/16512235.2017.1303265.
- 645 [7] S. B. Smith and J. Ravel, "The vaginal microbiota, host defence and reproductive  
646 physiology," *J Physiol*, vol. 595, no. 2, pp. 451-463, Jan 15 2017, doi:  
647 10.1113/JP271694.
- 648 [8] J. Ravel *et al.*, "Vaginal microbiome of reproductive-age women," (in eng), *Proceedings*  
649 *of the National Academy of Sciences of the United States of America*, vol. 108 Suppl 1,  
650 pp. 4680-7, Mar 15 2011, doi: 1002611107 [pii]  
651 10.1073/pnas.1002611107.
- 652 [9] C. Nardis, L. Mosca, and P. Mastromarino, "Vaginal microbiota and viral sexually  
653 transmitted diseases," (in eng), *Ann Ig*, vol. 25, no. 5, pp. 443-56, 2013 Sep-Oct 2013,  
654 doi: doi:10.7416/ai.2013.1946.
- 655 [10] J. J. Schellenberg and F. A. Plummer, "The Microbiological Context of HIV Resistance:  
656 Vaginal Microbiota and Mucosal Inflammation at the Viral Point of Entry," (in eng), *Int J*  
657 *Inflam*, vol. 2012, p. 131243, 2012, doi: 10.1155/2012/131243.

- 658 [11] D. W. White *et al.*, "Latent herpesvirus infection arms NK cells," (in eng), *Blood*,  
659 Research Support, N.I.H., Extramural  
660 Research Support, Non-U.S. Gov't vol. 115, no. 22, pp. 4377-83, Jun 3 2010, doi:  
661 10.1182/blood-2009-09-245464.
- 662 [12] M. R. Joesoef and G. Schmid, "Bacterial vaginosis," (in eng), *Clin Evid*, no. 13, pp.  
663 1968-78, Jun 2005.
- 664 [13] J. E. Bilardi *et al.*, "The burden of bacterial vaginosis: women's experience of the  
665 physical, emotional, sexual and social impact of living with recurrent bacterial  
666 vaginosis," (in eng), *PloS one*, vol. 8, no. 9, p. e74378, 2013, doi:  
667 10.1371/journal.pone.0074378.
- 668 [14] S. Srinivasan *et al.*, "Temporal variability of human vaginal bacteria and relationship  
669 with bacterial vaginosis," *PloS one*, vol. 5, no. 4, p. e10197, 2010, doi:  
670 10.1371/journal.pone.0010197.
- 671 [15] R. M. Brotman, J. Ravel, R. A. Cone, and J. M. Zenilman, "Rapid fluctuation of the  
672 vaginal microbiota measured by Gram stain analysis," (in eng), *Sex Transm Infect*, vol.  
673 86, no. 4, pp. 297-302, Aug 2010, doi: 10.1136/sti.2009.040592.
- 674 [16] B. M. Ngugi *et al.*, "Effects of bacterial vaginosis-associated bacteria and sexual  
675 intercourse on vaginal colonization with the probiotic *Lactobacillus crispatus* CTV-05,"  
676 (in eng), *Sex Transm Dis*, vol. 38, no. 11, pp. 1020-7, Nov 2011, doi:  
677 10.1097/OLQ.0b013e3182267ac4.
- 678 [17] K. Cadwell, "The virome in host health and disease," *Immunity*, vol. 42, no. 5, pp. 805-  
679 13, May 19 2015, doi: 10.1016/j.immuni.2015.05.003.

- 680 [18] K. M. Wylie, T. N. Wylie, A. G. Cahill, G. A. Macones, M. G. Tuuli, and M. J. Stout,  
681 "The vaginal eukaryotic DNA virome and preterm birth," (in eng), *Am J Obstet Gynecol*,  
682 vol. 219, no. 2, pp. 189.e1-189.e12, 08 2018, doi: 10.1016/j.ajog.2018.04.048.
- 683 [19] K. M. Wylie, K. A. Mihindukulasuriya, Y. Zhou, E. Sodergren, G. A. Storch, and G. M.  
684 Weinstock, "Metagenomic analysis of double-stranded DNA viruses in healthy adults,"  
685 *BMC biology*, vol. 12, p. 71, Sep 10 2014, doi: 10.1186/s12915-014-0071-7.
- 686 [20] K. M. Parmar, S. L. Gaikwad, P. K. Dhakephalkar, R. Kothari, and R. P. Singh,  
687 "Intriguing Interaction of Bacteriophage-Host Association: An Understanding in the Era  
688 of Omics," *Frontiers in microbiology*, vol. 8, p. 559, 2017, doi:  
689 10.3389/fmicb.2017.00559.
- 690 [21] D. Lawrence, M. T. Baldrige, and S. A. Handley, "Phages and Human Health: More  
691 Than Idle Hitchhikers," (in eng), *Viruses*, vol. 11, no. 7, Jun 2019, doi:  
692 10.3390/v11070587.
- 693 [22] A. Fillol-Salom *et al.*, "Bacteriophages benefit from generalized transduction," (in eng),  
694 *PLoS pathogens*, vol. 15, no. 7, p. e1007888, 07 2019, doi:  
695 10.1371/journal.ppat.1007888.
- 696 [23] R. R. Jakobsen *et al.*, "Characterization of the Vaginal DNA Virome in Health and  
697 Dysbiosis," (in eng), *Viruses*, vol. 12, no. 10, 10 2020, doi: 10.3390/v12101143.
- 698 [24] H. T. Zhang, H. Wang, H. S. Wu, J. Zeng, and Y. Yang, "Comparison of viromes in  
699 vaginal secretion from pregnant women with and without vaginitis," (in eng), *Viol J*, vol.  
700 18, no. 1, p. 11, 01 2021, doi: 10.1186/s12985-020-01482-z.
- 701 [25] L. H. Damelin, M. Paximadis, D. Mavri-Damelin, M. Birkhead, D. A. Lewis, and C. T.  
702 Tiemessen, "Identification of predominant culturable vaginal *Lactobacillus* species and

- 703 associated bacteriophages from women with and without vaginal discharge syndrome in  
704 South Africa," *Journal of medical microbiology*, vol. 60, no. Pt 2, pp. 180-3, Feb 2011,  
705 doi: 10.1099/jmm.0.024463-0.
- 706 [26] A. O. Kilic, S. I. Pavlova, S. Alpay, S. S. Kilic, and L. Tao, "Comparative study of  
707 vaginal Lactobacillus phages isolated from women in the United States and Turkey:  
708 prevalence, morphology, host range, and DNA homology," *Clinical and diagnostic  
709 laboratory immunology*, vol. 8, no. 1, pp. 31-9, Jan 2001, doi: 10.1128/CDLI.8.1.31-  
710 39.2001.
- 711 [27] S. I. Pavlova, A. O. Kilic, S. M. Mou, and L. Tao, "Phage infection in vaginal  
712 lactobacilli: an in vitro study," *Infectious diseases in obstetrics and gynecology*, vol. 5,  
713 no. 1, pp. 36-44, 1997, doi: 10.1155/S1064744997000094.
- 714 [28] A. Wahida, K. Ritter, and H. P. Horz, "The Janus-Face of Bacteriophages across Human  
715 Body Habitats," (in eng), *PLoS pathogens*, vol. 12, no. 6, p. e1005634, 06 2016, doi:  
716 10.1371/journal.ppat.1005634.
- 717 [29] J. M. Macklaim, A. D. Fernandes, J. M. Di Bella, J. A. Hammond, G. Reid, and G. B.  
718 Gloor, "Comparative meta-RNA-seq of the vaginal microbiota and differential expression  
719 by Lactobacillus iners in health and dysbiosis," *Microbiome*, vol. 1, no. 1, p. 12, 2013,  
720 doi: 10.1186/2049-2618-1-12.
- 721 [30] M. Rho, Y. W. Wu, H. Tang, T. G. Doak, and Y. Ye, "Diverse CRISPRs evolving in  
722 human microbiomes," *PLoS genetics*, vol. 8, no. 6, p. e1002441, 2012, doi:  
723 10.1371/journal.pgen.1002441.

- 724 [31] Q. Zhang, M. Rho, H. Tang, T. G. Doak, and Y. Ye, "CRISPR-Cas systems target a  
725 diverse collection of invasive mobile genetic elements in human microbiomes," *Genome*  
726 *biology*, vol. 14, no. 4, p. R40, 2013, doi: 10.1186/gb-2013-14-4-r40.
- 727 [32] H. Zhao *et al.*, "Mice deficient in Epg5 exhibit selective neuronal vulnerability to  
728 degeneration," (in eng), *The Journal of cell biology*, vol. 200, no. 6, pp. 731-41, Mar 18  
729 2013, doi: 10.1083/jcb.201211014  
730 jcb.201211014 [pii].
- 731 [33] L. Dylla, B. Abar, A. L. Williamson, T. L. Meiring, L. G. Bekker, and D. H. Adler,  
732 "Human papillomavirus clustering patterns among HIV-infected and HIV-uninfected  
733 adolescent females in South Africa," (in eng), *J AIDS HIV Res*, vol. 9, no. 10, pp. 202-  
734 206, Oct 2017, doi: 10.5897/JAHR2017.0445.
- 735 [34] D. W. Fadrosh *et al.*, "An improved dual-indexing approach for multiplexed 16S rRNA  
736 gene sequencing on the Illumina MiSeq platform," (in eng), *Microbiome*, vol. 2, no. 1, p.  
737 6, Feb 2014, doi: 10.1186/2049-2618-2-6.
- 738 [35] J. G. Caporaso *et al.*, "QIIME allows analysis of high-throughput community sequencing  
739 data," (in eng), *Nat Methods*, vol. 7, no. 5, pp. 335-6, May 2010, doi:  
740 10.1038/nmeth.f.303.
- 741 [36] E. Bolyen *et al.*, "Reproducible, interactive, scalable and extensible microbiome data  
742 science using QIIME 2," (in eng), *Nat Biotechnol*, vol. 37, no. 8, pp. 852-857, 08 2019,  
743 doi: 10.1038/s41587-019-0209-9.
- 744 [37] B. J. Callahan, P. J. McMurdie, M. J. Rosen, A. W. Han, A. J. Johnson, and S. P. Holmes,  
745 "DADA2: High-resolution sample inference from Illumina amplicon data," (in eng),  
746 *Nature methods*, vol. 13, no. 7, pp. 581-3, 07 2016, doi: 10.1038/nmeth.3869.



- 747 [38] T. Z. DeSantis *et al.*, "Greengenes, a chimera-checked 16S rRNA gene database and  
748 workbench compatible with ARB," (in eng), *Appl Environ Microbiol*, vol. 72, no. 7, pp.  
749 5069-72, Jul 2006, doi: 10.1128/AEM.03006-05.
- 750 [39] K. Katoh and D. M. Standley, "MAFFT multiple sequence alignment software version 7:  
751 improvements in performance and usability," (in eng), *Mol Biol Evol*, vol. 30, no. 4, pp.  
752 772-80, Apr 2013, doi: 10.1093/molbev/mst010.
- 753 [40] M. N. Price, P. S. Dehal, and A. P. Arkin, "FastTree 2--approximately maximum-  
754 likelihood trees for large alignments," (in eng), *PloS one*, vol. 5, no. 3, p. e9490, Mar  
755 2010, doi: 10.1371/journal.pone.0009490.
- 756 [41] C. Lozupone, M. E. Lladser, D. Knights, J. Stombaugh, and R. Knight, "UniFrac: an  
757 effective distance metric for microbial community comparison," (in eng), *The ISME*  
758 *journal*, vol. 5, no. 2, pp. 169-72, Feb 2011, doi: 10.1038/ismej.2010.133.
- 759 [42] D. Adler *et al.*, "High risk human papillomavirus persistence among HIV-infected young  
760 women in South Africa," *International journal of infectious diseases : IJID : official*  
761 *publication of the International Society for Infectious Diseases*, vol. 33, pp. 219-21, Apr  
762 2015, doi: 10.1016/j.ijid.2015.02.009.
- 763 [43] M. Zozaya-Hinchliffe, R. Lillis, D. H. Martin, and M. J. Ferris, "Quantitative PCR  
764 assessments of bacterial species in women with and without bacterial vaginosis," (in  
765 eng), *J Clin Microbiol*, vol. 48, no. 5, pp. 1812-9, May 2010, doi: 10.1128/JCM.00851-  
766 09.
- 767 [44] C. L. Monaco *et al.*, "Altered Virome and Bacterial Microbiome in Human  
768 Immunodeficiency Virus-Associated Acquired Immunodeficiency Syndrome," *Cell host*  
769 *& microbe*, vol. 19, no. 3, pp. 311-22, Mar 09 2016, doi: 10.1016/j.chom.2016.02.011.

- 770 [45] G. Zhao *et al.*, "VirusSeeker, a computational pipeline for virus discovery and virome  
771 composition analysis," *Virology*, vol. 503, pp. 21-30, Jan 18 2017, doi:  
772 10.1016/j.virol.2017.01.005.
- 773 [46] J. C. Pinheiro and D. M. Bates, *Mixed-Effects Models in S and S-PLUS*. New York:  
774 Springer-Verlag, 2000.
- 775 [47] K. Aagaard, J. Ma, K. M. Antony, R. Ganu, J. Petrosino, and J. Versalovic, "The placenta  
776 harbors a unique microbiome," (in eng), *Science translational medicine*, vol. 6, no. 237,  
777 p. 237ra65, May 2014, doi: 10.1126/scitranslmed.3008599.
- 778 [48] M. J. Anderson, "A new method for non-parametric multivariate analysis of variance,"  
779 *Austral Ecology*, vol. 26, pp. 32-46, 2001.
- 780 [49] K. L and R. PJ, *Finding Groups in Data: An Introduction to*  
781 *Cluster Analysis*. John Wiley & Sons, 1990.
- 782 [50] M. Kendall, "A New Measure of Rank Correlation," *Biometrika*, vol. 30, no. 1-2, pp. 81-  
783 93, 1938.
- 784 [51] R. C. Team. "A language and environment for statistical  
785 computing." R  
786 Foundation for Statistical Computing. (accessed.
- 787 [52] Y. Hochberg and Y. Benjamini, "Controlling the false discovery rate: a  
788 practical and powerful approach to multiple testing," *Journal of the Royal Statistical Society,*  
789 *Series*  
790 *B*, vol. 57, no. 1, pp. 289-300, 1995.

- 791 [53] M. G. Torcia, "Interplay among Vaginal Microbiome, Immune Response and Sexually  
792 Transmitted Viral Infections," *International journal of molecular sciences*, vol. 20, no. 2,  
793 Jan 11 2019, doi: 10.3390/ijms20020266.
- 794 [54] M. N. Anahtar *et al.*, "Cervicovaginal bacteria are a major modulator of host  
795 inflammatory responses in the female genital tract," *Immunity*, vol. 42, no. 5, pp. 965-76,  
796 May 19 2015, doi: 10.1016/j.immuni.2015.04.019.
- 797 [55] M. T. France *et al.*, "VALENCIA: a nearest centroid classification method for vaginal  
798 microbial communities based on composition," (in eng), *Microbiome*, vol. 8, no. 1, p.  
799 166, 11 2020, doi: 10.1186/s40168-020-00934-6.
- 800 [56] M. P. Ritz, A. L. Perl, J. M. Colquhoun, K. R. Chamakura, and G. F. Kutyl Everett,  
801 "Complete Genome of Bacillus subtilis Myophage CampHawk," (in eng), *Genome*  
802 *announcements*, vol. 1, no. 6, Dec 2013, doi: 10.1128/genomeA.00984-13.
- 803 [57] J. H. Grose, G. L. Jensen, S. H. Burnett, and D. P. Breakwell, "Correction: genomic  
804 comparison of 93 Bacillus phages reveals 12 clusters, 14 singletons and remarkable  
805 diversity," (in eng), *BMC genomics*, vol. 15, p. 1184, Dec 2014, doi: 10.1186/1471-2164-  
806 15-1184.
- 807 [58] Q. Xia *et al.*, "Identification of vaginal bacteria diversity and it's association with  
808 clinically diagnosed bacterial vaginosis by denaturing gradient gel electrophoresis and  
809 correspondence analysis," (in eng), *Infect Genet Evol*, vol. 44, pp. 479-486, 10 2016, doi:  
810 10.1016/j.meegid.2016.08.001.
- 811 [59] M. I. Petrova, E. Lievens, S. Malik, N. Imholz, and S. Lebeer, "Lactobacillus species as  
812 biomarkers and agents that can promote various aspects of vaginal health," (in eng),  
813 *Front Physiol*, vol. 6, p. 81, 2015, doi: 10.3389/fphys.2015.00081.

- 814 [60] A. Edlund, T. M. Santiago-Rodriguez, T. K. Boehm, and D. T. Pride, "Bacteriophage and  
815 their potential roles in the human oral cavity," *J Oral Microbiol*, vol. 7, p. 27423, 2015,  
816 doi: 10.3402/jom.v7.27423.
- 817 [61] J. S. Coleman and C. A. Gaydos, "Molecular Diagnosis of Bacterial Vaginosis: an  
818 Update," (in eng), *J Clin Microbiol*, vol. 56, no. 9, 09 2018, doi: 10.1128/JCM.00342-18.
- 819 [62] S. M. Gibbons, "Keystone taxa indispensable for microbiome recovery," (in eng), *Nat*  
820 *Microbiol*, vol. 5, no. 9, pp. 1067-1068, 09 2020, doi: 10.1038/s41564-020-0783-0.
- 821 [63] A. Yasmin *et al.*, "Comparative genomics and transduction potential of *Enterococcus*  
822 *faecalis* temperate bacteriophages," (in eng), *J Bacteriol*, vol. 192, no. 4, pp. 1122-30,  
823 Feb 2010, doi: 10.1128/JB.01293-09.
- 824 [64] I. M. Willms, M. Hoppert, and R. Hertel, "Characterization of *Bacillus Subtilis* Viruses  
825 vB\_BsuM-Goe2 and vB\_BsuM-Goe3," (in eng), *Viruses*, vol. 9, no. 6, 06 2017, doi:  
826 10.3390/v9060146.
- 827 [65] B. E. Khatemi, C. C. Chung On, K. R. Chamakura, and G. F. Kutty Everett, "Complete  
828 Genome of *Bacillus megaterium* Podophage Pony," (in eng), *Genome announcements*,  
829 vol. 1, no. 6, Dec 2013, doi: 10.1128/genomeA.00860-13.
- 830 [66] S. Mingmongkolchai and W. Panbangred, "Bacillus probiotics: an alternative to  
831 antibiotics for livestock production," (in eng), *J Appl Microbiol*, vol. 124, no. 6, pp.  
832 1334-1346, Jun 2018, doi: 10.1111/jam.13690.
- 833 [67] M. A. Brockhurst, A. D. Morgan, A. Fenton, and A. Buckling, "Experimental  
834 coevolution with bacteria and phage. The *Pseudomonas fluorescens*--Phi2 model  
835 system," (in eng), *Infect Genet Evol*, vol. 7, no. 4, pp. 547-52, Jul 2007, doi:  
836 10.1016/j.meegid.2007.01.005.

- 837 [68] Y. Turovskiy, K. Sutyak Noll, and M. L. Chikindas, "The aetiology of bacterial  
838 vaginosis," (in eng), *J Appl Microbiol*, vol. 110, no. 5, pp. 1105-28, May 2011, doi:  
839 10.1111/j.1365-2672.2011.04977.x.
- 840 [69] A. A. Vostrov, O. A. Vostrukhina, A. N. Svarchevsky, and V. N. Rybchin, "Proteins  
841 responsible for lysogenic conversion caused by coliphages N15 and phi80 are highly  
842 homologous," (in eng), *J Bacteriol*, vol. 178, no. 5, pp. 1484-6, Mar 1996, doi:  
843 10.1128/jb.178.5.1484-1486.1996.
- 844 [70] M. Pleckaityte, M. Zilnyte, and A. Zvirbliene, "Insights into the CRISPR/Cas system of  
845 *Gardnerella vaginalis*," (in eng), *BMC Microbiol*, vol. 12, p. 301, Dec 2012, doi:  
846 10.1186/1471-2180-12-301.
- 847 [71] R. M. Presti *et al.*, "Alterations in the oral microbiome in HIV-infected participants after  
848 antiretroviral therapy administration are influenced by immune status," (in eng), *AIDS*,  
849 vol. 32, no. 10, pp. 1279-1287, 06 2018, doi: 10.1097/QAD.0000000000001811.
- 850  
851  
852  
853  
854  
855  
856  
857
